# Supplementary material for: Child and Adolescent Mental Health and Resilience-Focussed Interventions: A Conceptual Analysis to Inform Future Research
Source: MDPI journal article supplement (doi:10.3390/ijerph18147315), 2021-07-08
Supplement: s1 [file s1]

**Supplementary Table S1:** Mapping of targeted protective factors against measured protective factors, for 37 trials included in the Dray et al., review incorporating a measure of protective factors<sup>[36]</sup>

| <b>Resilience Protective Factors (PF)</b>     | <b>n trials that targeted PF</b> | <b>n trials that measured PF</b> |
|-----------------------------------------------|----------------------------------|----------------------------------|
| <i>Internal resilience protective factors</i> |                                  |                                  |
| Cognitive competence                          | 23                               | 19                               |
| Cooperation and communication                 | 23                               | 1                                |
| Coping                                        | 18                               | 12                               |
| Emotional regulation                          | 8                                | 3                                |
| Empathy                                       | 16                               | 3                                |
| Goals and aspirations                         | 8                                | 0                                |
| Problem solving/decision making               | 28                               | 2                                |
| Self-control                                  | 3                                | 0                                |
| Self-efficacy                                 | 6                                | 5                                |
| Self-esteem                                   | 9                                | 2                                |
| Self-regulation                               | 19                               | 2                                |
| Self-awareness                                | 6                                | 1                                |
| Social and emotional competence               | 22                               | 6                                |
| Social and emotional skills                   | 13                               | 7                                |
| Spirituality                                  | 1                                | 0                                |
| <i>External resilience protective factors</i> |                                  |                                  |
| Community caring relationships                | 0                                | 1                                |
| Community meaningful participation            | 2                                | 1                                |
| Community support                             | 5                                | 2                                |
| Home caring relationships                     | 4                                | 4                                |
| Home support                                  | 3                                | 0                                |
| Peer caring relationships                     | 9                                | 2                                |
| Pro-social peers                              | 3                                | 2                                |
| School caring relationships                   | 3                                | 3                                |
| School meaningful participation               | 5                                | 5                                |
| School support                                | 3                                | 2                                |

**NB:** No included trials targeted or measured 6 of thirty-one factors utilised in the review. These were 2 internal factors: empowerment and moral competence; and four external factors: community adult high expectations, home adult high expectations, home meaningful participation and, school adult high expectations.
